1 **Little hope for the polyploid endemic Pyrenean Larkspur (*Delphinium***  
2 ***montanum*): evidences from population genomics and Ecological Niche**  
3 **Modelling**

4 Pascaline Salvado<sup>a</sup>, Pere Aymerich Boixader<sup>b</sup>, Josep Parera<sup>c</sup>, Albert Vila Bonfill<sup>d</sup>, Maria  
5 Martin<sup>c</sup>, Céline Quélenec<sup>c</sup>, Jean-Marc Lewin<sup>e</sup>, Valérie Delorme-Hinoux<sup>a,e</sup> & Joris A. M.  
6 Bertrand<sup>a</sup>

7 <sup>a</sup>Laboratoire Génome et Développement des Plantes (LGDP, UMR 5096 UPVD/CNRS),  
8 Université de Perpignan Via Domitia, 58 avenue Paul Alduy, F-66860 Perpignan, France.

9 <sup>b</sup>C. Barcelona, 29. 08600 Berga, Spain

10 <sup>c</sup>Fédération des Réserves Naturelles Catalanes, Prades, France

11 <sup>d</sup>Parc Natural de Capçaleres del Ter i del Freser, Quelralbs, Spain

12 <sup>e</sup>Association Charles Flahault, Toulouges, France

13

14 **Corresponding authors**

15 Joris Bertrand ([joris.bertrand@univ-perp.fr](mailto:joris.bertrand@univ-perp.fr)) and Valérie-Delorme Hinoux,  
16 ([valerie.hinoux@univ-perp.fr](mailto:valerie.hinoux@univ-perp.fr)), Laboratoire Génome et Développement des Plantes (LGDP,  
17 UMR 5096 UPVD/CNRS), Université de Perpignan Via Domitia, 58 avenue Paul Alduy, F-  
18 66860 Perpignan, France. Phone : + 33 (0)4 68 66 84 99

19

20 **Abstract**

21 Species endemic to restricted geographical ranges represent a particular conservation issue,  
22 be it for their heritage interest. In a context of global change, this is particularly the case for  
23 plants which belong to high-mountain ecosystems and, because of their ecological

24 requirements, are doomed to survive or disappear on their 'sky islands'. The Pyrenean  
25 Larkspur (*Delphinium montanum*, Ranunculaceae) is endemic to the Eastern part of the  
26 Pyrenees (France and Spain). It is now only observable at a dozen of localities and some  
27 populations show signs of decline, such as a recurrent lack of flowering. Implementing  
28 population genomic approach (e.g. RAD-seq like) is particularly useful to understand  
29 genomic patterns of diversity and differentiation in order to provide recommendations in  
30 term of conservation. However, it remains challenging for species such as *D. montanum* that  
31 are autotetraploid with a large genome size (1C-value > 10 pg) as most methods currently  
32 available were developed for diploid species. A Bayesian framework able to call genotypes  
33 with uncertainty allowed us to assess genetic diversity and population structure in this  
34 system. Our results show evidence for inbreeding (mean  $G_{IS} = 0.361$ ) within all the  
35 populations and substantial population structure (mean  $G_{ST} = 0.403$ ) at the metapopulation  
36 level. In addition to a lack of connectivity between populations, spatial projections of  
37 Ecological Niche Modelling analyses under different climatic scenarios predict a dramatic  
38 decrease of suitable habitat for *D. montanum* in the future. Based on these results, we  
39 discuss the relevance and feasibility of different conservation measures.

40

41 **Keywords** Sky islands, Inbreeding, Tetraploid, Restriction Site Associated DNA Sequencing  
42 (RAD-seq), Species Distribution Modelling, Genotyping By Sequencing (GBS)

## 43 **Introduction**

44 Extinction risk associated to climate change is expected not only to increase but to  
45 accelerate for every degree rise in global temperatures (Urban, 2015). In this context, the  
46 number of threatened species by reduced population sizes, habitat degradation and habitat  
47 fragmentation is increasing. Small and fragmented populations are particularly prone to be  
48 affected by drift and inbreeding depression and generally display decreased levels of genetic  
49 diversity (e.g. Bergl et al. 2008; Dixo et al. 2009). The increase of anthropogenic and  
50 environmental pressures, both being intimately bound, represents an unprecedented threat  
51 for vulnerable species. In particular, populations from species of high-mountain ecosystems  
52 might not be able to move upward rapidly enough to keep within their thermal tolerances  
53 and might be doomed on their 'sky islands' (see McCormack et al. 2009, e.g. Kidane et al.  
54 2019, De Gabriel Hernando et al. 2021). Thus, species endemic to specific mountain ranges  
55 represent a major conservation issue, if only for their heritage interest. It is critical to  
56 characterize the distribution of genetic diversity within- and between- their populations to  
57 evaluate the inbreeding risk and study population structure to better understand how  
58 isolated they really are, in order to undertake effective conservation actions (Calevo et al.  
59 2021).

60       The threatened Pyrenean larkspur *Delphinium montanum* DC., 1815 perfectly  
61 illustrates this situation. This plant (Family Ranunculaceae), endemic to the Eastern part of  
62 the Pyrenees (France and Spain), is now only observable at a dozen of localities (two already  
63 got extinct over the 20<sup>th</sup> century) and its global population size was estimated to range  
64 between 7 800 to 10 300 individuals in total (Aymerich et al. 2020). It occurs between alpine  
65 and subalpine levels, between 1 600 and 2 400 m (López-Pujol et al. 2007). *D. montanum* is  
66 vulnerable as a result of increasing levels of multiple threats. Some of its populations are

67 located nearby touristic sites (*i.e.* mountain resorts or hiking trails) and are negatively  
68 impacted by trampling (Simon et al., 2001). Flowers and fruits predation by herbivores,  
69 particularly Pyrenean chamois/isards (*Rupicapra pyrenaica pyrenaica*) was also shown to be  
70 responsible for the seed bank's decrease in some populations (Simon et al. 2001, Aymerich  
71 2003). Importantly, differences in population dynamics are observable from one population  
72 to another. Some populations are stable, whereas others show decrease in population size  
73 (4-Pedraforca) and/or absence of flowering individuals since 2011 (2-Nohèdes). Pioneering  
74 work of Simon et al. (2001) and Lopéz-Pujol et al. (2007) also suggested relatively low  
75 effective size as well as, evidence of inbreeding within-populations and significant  
76 population structure. However, these two studies were based on a limited number of  
77 genetic markers (*i.e.* 7 and 14 allozyme *loci*, respectively) and populations studied (*i.e.* 2 and  
78 7, respectively).

79         Implementing a population genomic approach on *D. montanum* could be particularly  
80 fruitful to inform conservation strategies by providing a substantial increase in the resolution  
81 of the genetic marker dataset and genome complexity reduction protocols such as Reduction  
82 site-associated DNA sequencing (or RAD-seq, Baird 2008) allow to get such information on  
83 tens to hundreds of individuals. However, the features of the genome of the species make  
84 *Delphinium montanum* particularly challenging from a technical and methodological point of  
85 view. *D. montanum* is an autotetraploid species (Simon et al. 2001; Lopéz-Pujol et al. 2007).  
86 Our recent flow cytometry estimates of 10.32 pg/1C for this species (*i.e.* about twice the 1C-  
87 value reported for several other diploid *Delphinium* species) corroborates previous  
88 knowledge and confirms the large genome size of *D. montanum* (Bertrand et al. unpublished  
89 data). A large genome size can be considered has a limitation as itself, be it because in  
90 requires higher sequencing efforts and costs to carry out conservation studies. The difficulty

91 to infer genotype and allele frequencies on polyploid species with RAD-seq techniques as  
92 well as the restricted set of methods available to analyze such data (see Meirmans and van  
93 Tienderen 2013; Dufresne et al. 2014; Meirmans et al. 2018) is also likely to explain the  
94 relatively low number of population genomics studies dealing with RAD-seq like techniques  
95 on non-model polyploid organisms (Clevenger et al. 2015; van de Peer et al. 2017, Ahmad  
96 2021).

97 Out the handful of studies that have addressed population genomic questions on  
98 polyploid organisms without reference genome, some have considered the genotypes as  
99 diploid-like data, an assumption that allows to use classical variant calling tools with default  
100 settings (e.g. Brandrud et al. 2017, see also Brandrud et al. 2019; 2020 and Závěská et al.  
101 2019). Consensus allelic information may also be coded in the form of ambiguous sites at  
102 heterozygous positions (e.g. Wagner et al. 2020). At last, a couple of methods are able to  
103 incorporate ploidy-aware calling algorithms and use genotype likelihoods to infer tetraploid  
104 genotypes (e.g. Závěská et al. 2019; Brandrud et al. 2020; Karbstein et al. 2020; Ahmad et al.  
105 2021). In studies for which both kind of methods were used, the latter one generally  
106 outputted a higher number of variable sites but signals were found to be overall congruent  
107 (Závěská et al. 2019; Brandrud et al. 2020).

108 The recent studies of Závěská et al. (2019), Brandrud et al. (2020) and Ahmad et al.  
109 (2021) used the RAD-seq loci from the catalog generated in the popular pipeline Stacks  
110 (Catchen et al. 2011; Catchen et al. 2013) to generate a synthetic reference onto which the  
111 raw reads are mapped back before to infer tetraploid genotypes with the approach  
112 implemented in EBG (Empirical Bayes Genotyping in Polyploids, Blischak et al. 2018, see also  
113 Blischak et al. 2016). As a putative alternative, Clark et al. (2019) proposed a package called  
114 PolyRAD to call genotypes with uncertainty from polyploid data in an R environment.

115 PolyRAD can deal with multiple levels of ploidy and is able to use for example population  
116 structure, linkage disequilibrium and/or self-fertilization as priors to estimate genotype  
117 probabilities. To our best knowledge, this promising and convenient method has been rarely  
118 used to implement a population genomic approach on natural populations of polyploid non-  
119 model organisms.

120         In this study, we first aimed at reevaluating the conservation status of *Delphinium*  
121 *montanum* following such population genomics approach. We used a protocol called  
122 normalized Genotyping By Sequencing (nGBS) that provided us with thousands of genetic  
123 markers (SNPs) from which we inferred patterns of diversity and differentiation with an  
124 unprecedented resolution in order to quantify inbreeding and level of connectivity between  
125 populations. We then used an Ecological Niche Modelling (ENM) approach to better  
126 understand the bioclimatic features that constraint the current geographic distribution of *D.*  
127 *montanum*. Based on several Global Climate Models (CGM), we also predicted the putative  
128 evolution of the geographic distribution of the species in the future, at different time periods  
129 (2011-2040, 2041-2070 and 2071-2100) and under different, more or less pessimistic but still  
130 realistic scenarios of evolution of global warming (or RCPs for Representative Concentration  
131 Pathways).

132

## 133 **Materials and Methods**

### 134 **Geographic distribution and population sampling**

135 The Pyrenean Larskpur (*Delphinium montanum*) geographic distribution ranges from Serra  
136 del Cadí-Pedraforca (Fig. 1, localities 4, 5, 8, and 9) up to the Puigmal massif (localities 1, 3  
137 and 6) via Tosa d'Alp massif (locality 7). There, the distance between the most distant sites is  
138 about 60 km, and only one locality is located outside this area: Nohèdes (locality 2), in the

139 Madres massif. This latter locality is separated from the Puigmal massif populations by the  
140 pit of Cerdagne-Conflent, which could have formed a historical barrier to gene flow. In terms  
141 of population size, Cadí-Pedraforca is the most important with up to 70% of the global  
142 population size (5 450-6 700 individuals). The sites of the Puigmal massif represent 25 to  
143 30% of the global population (2 200-2 700 individuals). Localities of Madres massif (2) and  
144 Tosa d'Alp (7) are numerically low (less than 300, from which none are actually flowering  
145 and 35 individuals, respectively).

146 We sampled a total of 106 individuals from 9 localities representative of the  
147 geographic distribution of *Delphinium montanum* (in the Eastern Pyrenees: 3 sites in France  
148 and 6 in Spain) between July and October 2020 (Table 1, Fig. 1, see also Supplementary  
149 Appendix S1). At each locality, we collected one individual distant from at least 1 meter from  
150 each other, about 1-2 cm<sup>2</sup> of leaf tissues that were stored in 90% ethanol at 4°C until DNA  
151 extraction. *Delphinium montanum* is not legally protected in France but is considered as  
152 vulnerable (VU) on the Red List of threatened species of IUCN France (IUCN France, FCBN,  
153 AFB, MNHN, 2018). It is legally protected in Catalonia (Decret 172/2008. Catàleg de flora  
154 amenaçada de Catalunya) and Spain (Orden AAA/1771/2015. Modificaci3n del cat3logo de  
155 especies amenazadas). In France, for all sampling done in natural reserves, special  
156 authorizations were granted by the 'Direction D3partementale des Territoires et de la Mer  
157 66' (DDTM 66). In Spain, we asked for and obtained special permits from the Servei de Fauna  
158 i Flora de la Generalitat de Catalunya and Natural Parks (Cad3-Moixer3 and Ter-Freser).

159

## 160 **Molecular procedures**

161 Genomic DNA extraction and genotyping were subcontracted to LGC Genomics GmbH  
162 (Berlin, Germany). Genotyping-By-Sequencing (GBS) was performed following a specific

163 protocol called nGBS for ‘normalised GBS’. This double digest Restriction site-Associated  
164 DNA seq (or RAD-seq) like protocol relies on two restriction enzymes (PstI and ApeKI, in our  
165 case) to reduce *D. montanum* genome complexity and includes a normalization step that  
166 aims at avoiding repetitive regions. The resulting 106 individually barcoded libraries were  
167 sequenced in paired-end mode (2 x 250 bp) on an Illumina NovaSeq 6000 with an  
168 expectation of a minimum number of 1.5 million read pairs per sample.

169

### 170 **Genomic data processing**

171 We used Stacks v.2.41 (Catchen et al. 2011; 2013) to build loci from Illumina reads, *de novo*  
172 (*i.e.* without aligning reads to a reference genome). Stacks consists of a wrapper of several  
173 scripts that are usually run sequentially including: *process\_radtags* to demultiplex and clean  
174 reads, *denovo\_map.pl* to build loci within individuals, create a catalog and match all samples  
175 against it and *populations* to further filter the SNPs obtained at the population level and  
176 compute basic population genetic statistics. We first optimised several key parameters of  
177 the pipeline: *-m* (the minimum number of identical raw reads required to form a putative  
178 allele), *-M* (the number of mismatches allowed between alleles to form a locus) and *-n* (the  
179 number of mismatches allowed between loci during construction of the catalog) on a subset  
180 of 12 individuals representative of the whole data set (*i.e.* geographic origin and coverage).  
181 As recommended by several authors, we varied *M* and *n* (fixing  $M = n$ ) while keeping  $m = 3$   
182 (see Paris et al. 2017; Rochette & Catchen 2017). The combination *-m 3*, *-M 3* and *-n 3* was  
183 found to be the most suitable to maximize the number of SNPs, assembled and polymorphic  
184 loci in our case and was used to run Stacks on the whole data set (see Supplementary  
185 Appendix S2). As *D. montanum* is a tetraploid species, we also specified the option ‘*-X*  
186 *ustacks:--max\_locus\_stacks 5*’ (in the *ustacks* script’s) to allow the number of alleles per site



187 to reach the number of 5 instead of 3 by default. However, as the *populations* script is  
188 unable to deal with polyploid genotypes, we followed a different approach to call variants  
189 and complete genomic data processing.

190 We then used polyRAD (Clark et al. 2019), a method implemented in an R-package to  
191 call genotypes with uncertainty from sequencing data in polyploids. The Bayesian genotype  
192 caller implemented in polyRAD is able to import read depth from the catalog and matches  
193 files from Stacks through a specific function called `polyRAD::read_stacks()` to further  
194 estimate the probability of each possible genotype for each individual and each locus, taking  
195 into account features such as possible levels of ploidy and population structure as priors. In  
196 order to get similar filtering parameters than with Stacks and following the polyRAD author's  
197 guidelines, we used the following arguments `-min.ind.with.minor.alleles= 5`, `-`  
198 `min.ind.with.reads= 84` and a ploidy of 4. We then plotted the distribution of the ratio of the  
199 individual over expected heterozygosity  $H_{ind}/H_E$ . The peak of the distribution of  $H_{ind}/H_E$  by  
200 locus (0.2) was considered to represent well-behaved markers from which inbreeding ( $F$ )  
201 was estimated at 0.73. From this estimate of  $F$ , we then simulated the expected distribution  
202 of  $H_{ind}/H_E$  if all markers were behaving in a Mendelian fashion. Based on the distribution, we  
203 defined minimum and maximum thresholds of 0 and 0.406 comprising 95% of the  
204 observations and filtered out markers for which  $H_{ind}/H_E$  were outside this interval. We then  
205 tested overdispersion (*i.e.* in our case, how much does read depth distribution deviate from  
206 what would be expected under binomial distribution) and adjusted its parameter to 6 (from  
207 a range of 2 to 14). This information was used to call genotypes while taking into account  
208 population genetic structure. The most likely genotypes of the remaining 5 095 loci were  
209 then exported in several formats such as genind objects or Structure (.str).

210

## 211 **Population genomic analyses**

212 To get an overview of the overall genetic diversity and differentiation among individuals and  
213 populations, we first performed a Principal Component Analysis (PCA) based on a matrix of  
214 106 individuals (as rows) and 5 095 SNPs (as columns) coded as a genind object with the R-  
215 package 'adegenet' (Jombart 2008). We then used Genodive v.3.04 (Meirmans 2020) to  
216 compute expected and observed heterozygosity ( $H_E$  and  $H_O$ , respectively) as well as the  
217 number of alleles ( $A$ ) and the number of private alleles was computed with the R-package  
218 'poppr' (Kamvar et al. 2014). The deviation from panmixia was evaluated by computing  $G_{IS}$   
219 and the statistical significance of the obtained values was estimated based on 10 000  
220 permutations, also in Genodive. Overall and pairwise genetic differentiation was also  
221 assessed based on  $G$ -statistics ( $G_{ST}$ , Nei 1987) as implemented in Genodive in a similar  
222 manner. Pattern of Isolation By Distance (IBD) was assessed by examining the relationship  
223 between linearized  $G_{ST}$ s values (*i.e.*  $\ln(G_{ST}/(1- G_{ST}))$ ) and  $\ln$ -geographical distances (after  
224 Rousset 1997) and its statistical significance was tested with a Mantel test between matrices  
225 of pairwise  $G_{ST}$  and geographical distance.

226 To further investigate population structure and characterize putative  
227 migration/admixture event, we used sNMF (Frichot et al. 2014) as implemented in the R-  
228 package LEA (Frichot & François 2015) to estimate individual ancestry coefficients based on  
229 sparse non-negative matrix factorization algorithms. sNMF is particularly suitable for our  
230 genotype dataset as it can deal with polyploid data and is fast enough to be applied on  
231 hundreds of individuals and thousands of markers with reasonable computation time. The  
232 number of genetic clusters was varied from  $K = 1$  to 10, and analyses were run with 10  
233 replicates at each value of  $K$ .

234

## 235 **Ecological Niche Modelling**

236 In order to assess the future trends of spatial dynamics of *D. montanum* distribution in a  
237 context of global change, we conducted Ecological Niche Modelling (ENM) analyses based on  
238 known occurrences of the species. Based on 19 bioclimatic layers we downloaded from  
239 CHELSA v.2.1 (Karger et al. 2017), we aimed to i) model current environmental niche and ii)  
240 predict the spatial evolution of the niche in the future. The bioclimatic layers available in  
241 CHELSA are similar to those available in WORLDCLIM (Fick et al. 2017) in a way that they  
242 consist of downscaled Global Climate Models (GCM) output temperature and precipitation  
243 estimates at a maximal resolution of 30 arc seconds (approximately 1 km). In the current  
244 study, we used the most recent version of CHELSA as the methodology and bias correction it  
245 implements have been shown to outperforms WORLDCLIM in mountainous environments  
246 (Karger et al. 2017; Bobrowski et al. 2021). Current climate data correspond to time  
247 averaged variables over the period 1981-2010.

248 Future climates correspond to estimates from phase 3b of the Inter-Sectoral Impact  
249 Model Intercomparison Project (ISIMIP3b) based on output of phase 6 of the Coupled Model  
250 Intercomparison Project (CMIP6). They consist of the output of five GCMs (GFDL-ESM4,  
251 UKESM1-0-LL, MPI-ESM1-2-HR, IPSL-CM6A-LR and MRI-ESM2-0) and three climate scenario  
252 specifiers (ssp126, ssp370, ssp585). Climate scenarios specifiers reflect different  
253 Representative Concentration Pathways (RCPs) associated with different radiative forcing  
254 values: 2.6, 7.0 and 8.5 W/m<sup>2</sup> that can be considered as a plausible range of greenhouse gas  
255 concentrations that appear to be optimistic, very likely and pessimistic in term of climate  
256 change, respectively. Annually averaged data were downloaded for three future time  
257 periods: 2011-2040 (“2035”), 2041-2070 (“2055”) and 2071-2100 (“2085”).

258           The ENM analyses were conducted thanks to the R-package ENMwizard v.0.3.7  
259 (Heming et al. 2018, see also Gutiérrez et al. 2019; Bagley et al. 2020). We first spatially  
260 filtered occurrences to keep only those that were at least 1 km away from each other using  
261 the R-package ‘spThin’ (Aiello-Lammens et al. 2015). Due to the relatively small spatial scale  
262 of the area under study, this resulted in considering a total of 9 out the 106 occurrences  
263 initially available. We then examined raw values for the 19 bioclimatic variables extracted at  
264 each occurrence point and noticed that the variable bio19 (“precipitation of coldest  
265 quarter”) displayed obviously aberrant (*i.e.* negative) values. This variable bio19 was thus  
266 discarded from subsequent analyses. From the 18 remaining variables (bio1 to bio18), we  
267 selected the less correlated ones (Person correlation coefficient < 0.75) thanks to the R-  
268 package ‘caret’ (Kuhn 2019) and kept five variables: bio5 (“mean daily maximum air  
269 temperature of the warmest month”), bio7 (“annual range of air temperature”), bio14  
270 (“precipitation amount of the driest month”) and bio15 (“precipitation seasonality”) for  
271 further analyses.

272           The calibration area for the models was created as a buffer of 1.5° around the  
273 minimum convex polygon encompassing all occurrences. We used the maximum entropy  
274 method (implemented in MaxEnt ver. 3.4.1, Phillips et al. 2006, 2017) to calibrate model and  
275 evaluated model performance thanks to the package ENMeval (Muscarella et al. 2014) as  
276 implemented in ENMwizard. We evaluated models using a geographic partition scheme of  
277 type “block” and optimized two parameters of MaxEnt: the Regularization Multipliers (RM)  
278 and the Feature Classes (FC). RM was varied from 0.5 to 4.5, incremented by 0.5 whereas a  
279 suite of 15 FCs (L, for Linear, P, for Product, Q, for Quadratic and H for Hinge) or combination  
280 of them were evaluated: L, P, Q, H, LP, LQ, LH, PQ, PH, QH, LPQ, LPH, LQH, PQH, LPQH,  
281 resulting in a total of 135 models. Model selection was done by computing the corrected

282 Akaike Information Criterion (“LowAIC”) and the Area Under the receiver operating  
283 characteristic Curve (“AUC”) in the function ENMWizard::calib\_md1\_b(). The relative  
284 importance of the different variables was evaluated with the function  
285 ENMWizard::get\_cont\_permimport() . The best selected model was then spatially projected  
286 as current niche. For future predictions, a spatial projection of the consensus of the five  
287 CGMs was performed for each time period and each RCPs. Area calculations were carried  
288 out after applying a 10-percentile (x10ptp) and a Maximum training sensitivity plus  
289 specificity (mtss) threshold rules.

290

## 291 **Results**

### 292 **Genetic diversity and differentiation**

293 We obtained a total of 159 million read pairs across the 106 individuals (2 283 178 to 6 266  
294 452 of raw reads per ind., mean 3 761 722, s.d. = 873 055). We assembled a total of 210 756  
295 loci including 22 911 SNPs with Stacks. Average read depth ranged from 27X to 53X based on  
296 the combination of parameters we used. After filtering the data with polyRAD, we finally  
297 obtained 32 728 loci including 5 095 SNPs.

298       The two first PCA axes (PC1 and PC2) represented 14.85% and 9.21% of the total  
299 genetic variance, respectively (Fig. 2A). This analysis is consistent with limited amount of  
300 within-population differentiation and a clear pattern of between-population differentiation.  
301 Overall, populations are arranged according to geography, especially along PC1. In term of  
302 genetic diversity, all populations display a significant deviation from panmixia: mean  $G_{IS}$  =  
303 0.361,  $p < 0.05$  and population  $G_{IS}$  values ranging from 0.315 to 0.426 (all  $p < 0.05$ ). However,  
304  $G_{IS}$  values appear as similar from one population to another (this holds true for the number

305 of total alleles  $A$ , too, see Table 1). The number of private alleles  $A_p$  is consistent with the  
306 relative level of geographic isolation of the populations.

307 The degree of genetic differentiation was found to be relatively high overall (mean  
308  $G_{ST}$  value = 0.403,  $p < 0.05$ ) and pairwise (with values ranging from 0.156 to 0.527,  
309 Supplementary Appendix S3). There is a clear and significant pattern of Isolation By Distance  
310 across the dataset ( $r = 0.601$ ,  $p = 0.001$ , Fig. 3) indicating that gene flow is limited in space at  
311 the scale of the *D. montanum* geographic range. The sNMF analysis is also consistent with a  
312 strong population structure arranged with geography. Cross-entropy was the lowest for  $K=6$   
313 (Fig. 2B and 2C). Each cluster corresponds to a sampling site with two exceptions. The  
314 individuals from the locality of 1-Orrí de Baix were grouped together with the close locality  
315 of 6-Cambre d'Aze, and the Western localities of the Serra del Cadí (8-Bastanist), 5-Serra  
316 Pedregosa and to a lesser extent 4-Pedraforca) formed another group. Only the individuals  
317 of 4-Pedraforca showed mixed ancestry coefficients.

### 318 **Suitable habitats for *D. montanum* and prediction of its spatial dynamics**

319 ENMeval analyses identified  $RM = 2$  and a combination of Quadratic and Hinge feature (QH)  
320 classes as the best-performing parameters for calibrating the final ENM following the  
321 "LowAIC" and  $M=2$  and a combination of Product and Hinge feature (PH) classes following  
322 the "AUC" optimality criteria. The first model had the best corrected Akaike Information  
323 Criterion (AICc) score (152.25) and an AICc weight of 0.33 whereas the second one had an  
324 AICc score of 174.63 and an AICc weight of  $4.53 \cdot 10^{-6}$ . These two models had mean omission  
325 rates of 0.375 and 0.25 for the 10<sup>th</sup> percentile and the lowest presence training thresholds,  
326 respectively, as well as a mean test AUC of 0.988. Values of these diagnostic metrics are  
327 provided for all candidate models in Supplementary Appendix S4. Both models ( $RM=2/PH$   
328 and  $RM=2/QH$ ) considered bio15 ("precipitation seasonality") as being the most important

329 explanatory variable with a contribution of 88.6% and 90.0%, respectively, followed by bio7  
330 (“Temperature annual range (bio5-bio6)”) with 6.2% and 7.1% and bio5 “Maximum  
331 temperature of the warmest month” with 5.2 and 3.0%; the contribution of bio14  
332 “Precipitation of the driest month”, being 0% with both models. Current suitable area for *D.*  
333 *montanum* was found to be 2 670 and 2 365 km<sup>2</sup> following “LowAIC” and “AUC” selection  
334 model criteria, respectively (the values were identical whatever the threshold method used).  
335 All future consensus spatial projections predict a dramatic decrease of the suitable area  
336 (Table 2 and Fig. 4). For RCPs 7.0 and 8.5, the suitable area would have completely  
337 disappeared for the time period 2071-2100 (but not for RCP 2.6). We also notice some  
338 slightly different outcomes depending on the selection model criteria with RCP 8.5 scenarios  
339 giving sometimes higher values than RCP 7.0, and even RCP 2.6 (e.g. time period 2011-2040,  
340 “Low AIC” criterion).

341

## 342 **Discussion**

### 343 **Conservation genomics on a polyploid species with large genome size**

344 The use of RAD-seq like (nGBS) data with the method implemented in PolyRAD allowed us to  
345 successfully address the challenge of conducting a population genomic approach on a plant  
346 species that is both polyploid (autotetraploid) and has a large genome size (> 10 Gbp). It  
347 confirms the convenience of the workflow we used, specifically calling genotypes in an R-  
348 environment, as an alternative to the ones followed in the handful of studies recently  
349 published on similar systems (e.g. Závěská et al. 2019; Brandrud et al. 2020; Karbstein et al.  
350 2020; Ahmad et al. 2021). From the > 5 000 SNPs we could rely on, we were able to get an  
351 unprecedented genomic picture of the diversity and the differentiation of the species in  
352 order to propose appropriate conservation recommendations. The results we obtained at

353 the genome scale are overall consistent with previous knowledge on population genetics of  
354 *D. montanum* (see Simon et al. 2001; López-Pujol 2007).

355

### 356 **A set of populations isolated on sky islands**

357 Our results confirm that populations of *D. montanum* can be seen as a set of island-like  
358 dwelling systems separated from each other by a matrix of unsuitable habitats and that gene  
359 flow has little to no chance to be efficiently maintained within this metapopulation. All  
360 populations considered in this study were found to display deficit in heterozygotes ( $G_{IS} >$   
361  $0.315$ ,  $p < 0.05$ ). These results confirm previous findings of Simon et al. (2001) and López-  
362 Pujol et al. (2007) and show that the autotetraploid status of the species does not impede  
363 relatively low levels of heterozygosity ( $H_0 < 0.17$ ). Polyploidy is expected to be associated  
364 with increased genetic variation, a characteristic that provides more diversity to adapt  
365 (especially to extreme environments such as mountainous ones) and allows buffering effect  
366 against deleterious mutations (see van de Peer et al. 2021 and references therein). From a  
367 conservation point of view, polyploidy does not seem to be associated with increased risk of  
368 extinction even though plant with big genome size may be more prone to be under threat  
369 (Vinogradov 2003; Pandit et al. 2011). As two other closely related congeneric species of  
370 *Delphinium montanum*: *D. dubium* and *D. oxysepalum*, that are endemic to the Alps and the  
371 Carpathians, respectively, are also tetraploid (López-Pujol et al. 2007), we speculate that  
372 polyploidy may have allowed to these species to adapt and survive into these mountainous  
373 environments. The open question is whether current levels of genetic diversity may be  
374 sufficient or not to allow *D. montanum* populations to overcome inbreeding depression and  
375 provide sufficient variation for adaptation in a context of global change. It should be noted  
376 that levels of genetic diversity are overall similar among the populations investigated and we



377 could not associate obvious signs of decline of some of them (e.g. Nohèdes, Pedraforca) to  
378 decreased levels in genetic diversity or evidence for deviation from panmixia. This suggests  
379 that the evidences of possible decrease in effective size may be too recent to be detectable  
380 at the genetic level (see Peery et al. 2012). Unfortunately, the limited number of available  
381 methods for polyploids makes effective size estimation and test for bottleneck events  
382 cumbersome to perform in such systems.

383         The PCA, the clustering analyses, the  $F_{ST}$  values as well as the pattern of Isolation By  
384 Distance, further confirm limited gene flow between populations and the existence of a  
385 population structure that is consistent with geography. The most likely number of clusters  
386 found in the sNMF analysis ( $K=6$ ) globally distinguishes populations from the Serra del Cadí  
387 (8-Bastanist, 5-Serra Pedregosa and 4-Pedraforca) from those of the Puigmal range (1-Orrí  
388 de Baix and 6-Cambre d’Aze) plus the satellite populations of 3-Vallter, 2-Nohèdes, 7-Tosa  
389 d’Alp and 9-Torreta de Cadí (which is the westernmost locality, a bit distant from the others  
390 in the Serra del Cadí). Only the locality of 4-Pedraforca shows some ambiguity in population  
391 assignment that could indicate a mixed origin. At  $K=2$ , the intermediate status of 7-Tosa  
392 d’Alp (and to a lesser extent of 4-Pedraforca) are also in agreement with its intermediate  
393 geographic position and may reflect an ancestral split between Northern and Southern  
394 populations. Altogether, these results support that the insect pollinators (mainly  
395 bumblebees) and the natural dispersal of seeds produced (barochoric) are not able to  
396 maintain gene flow over the geographic distances involved.

397

### 398 **Climate change as the main threat for *Delphinium montanum***

399 The two previous studies of Simon et al. (2001) and López-Pujol et al. (2007) have listed  
400 several threats to explain the decline of *D. montanum*, at least in some particular

401 populations. According to Simon et al. (2001), natural disturbance of habitats due to rock  
402 falls and avalanches, trampling because of an overall increase in human visits and animal  
403 predation (e.g. caterpillar, Pyrenean chamois/isards and perhaps red and roe deers) as well  
404 as competition for insect pollinators with simultaneously blooming species (e.g. *Aconitum*  
405 spp.) have thus been considered as more or less serious problems for *D. montanum*. The  
406 most recent study of López-Pujol et al. (2007) also emphasized on the consequences of the  
407 erosion of genetic diversity, especially the loss of rare alleles associated with weak possibility  
408 of gene flow between localities that could be however compensated by relatively high  
409 effective size in several populations. Without ruling out all these threats on *D. montanum*  
410 populations, our results rather support climate change as the main threat for this species.  
411 The future predictions of the area of habitat suitability all agree that the spatial extent of the  
412 ecological niche of *D. montanum* is very likely to dramatically decrease, and even disappear  
413 by the end of the 21<sup>th</sup> century, with some differences based on the various scenarios we  
414 considered. The current suitable habitat for *D. montanum* has an area that was estimated at  
415 about 2500 km<sup>2</sup>, an area that would decrease to about 500 km<sup>2</sup> (i.e. -75 %), by 2040  
416 whatever the scenario envisaged. By 2070, this area would again have decreased to about  
417 150 km<sup>2</sup> based on RCP 2.6 and up to less than 50 km<sup>2</sup> based on the two other scenarios (RCP  
418 7 and RCP 8.5). A Representative Concentration Pathway of 2.6 W/m<sup>2</sup> has to be considered  
419 as a rather optimistic pathway (that would keep global temperature rise below 2°C by 2100).  
420 It would require that CO<sub>2</sub> emissions start declining by 2020 and go to zero by 2100 (as well as  
421 declines in emission of other greenhouses gases, such as CH<sub>4</sub>, SO<sub>2</sub>). RCP 7 is usually  
422 considered as a baseline rather than a mitigation target. According to RCP 8.5, emissions  
423 would continue to rise throughout the 21<sup>st</sup> century and can be considered as a pessimistic  
424 scenario (with an increase in average temperature in the order of 4°C by 2100). The various

425 output of these scenarios likely explains why the bioclimatic niche of *D. montanum* would  
426 have completely disappeared by 2100 for RCP 7 and 8.5 but could have persisted and even  
427 started to increase again to about 10% of its current suitable area following the RCP 2.6  
428 scenario.

429 Environmental changes as the main threat for *D. montanum* populations is also  
430 supported from field observations. The population of Nohèdes (2) have not flowered since  
431 2011. The individuals there are very small (*i.e.* a few centimetres high) and remain at a  
432 vegetative stage. On this site, we could not notice any evidence of avalanche or landslide  
433 that could have altered the habitat. In addition, other plants species present in the vicinity  
434 (*e.g.* *Orchis spitzelii*, *Maianthemum bifolium* and *Convallaria majalis*) seem to suffer from  
435 flowering default, further supporting that this phenomenon could be non-specific to *D.*  
436 *montanum* and perhaps caused by bioclimatic or at least environmental modifications.  
437 There, output from Regional Climate Models (RCMs) predict an increase in mean annual  
438 temperature that could reach 3.1 to 4.5°C (+1.5°C already observed since the mean of the  
439 period 1961-1990) associated with a decrease in precipitation of up to 25% and perhaps  
440 more compared to present-day conditions (Lespinas et al. 2014). According to the same  
441 study, precipitations would mostly decrease in summer (-40%) and in spring (-20%) but  
442 would remain similar the rest of the year. This in accordance with our ENM predictions  
443 suggesting that bio15 “Precipitation seasonality”, the annual coefficient of variation of  
444 rainfall may be by far, the most important variable in explaining the bioclimatic niche of *D.*  
445 *montanum*.

446

447 **Recommendations for conservation**

448 *Ex-situ* conservation would be a way to preserve the genetic diversity of *D. montanum*, but  
449 also a bridge for future *in-situ* conservation efforts. A seed collection of different populations  
450 of *D. montanum* could be stored in a bank. However, this measure would be of limited  
451 interest if the decline's cause of *D. montanum* is actually climate change as keeping dormant  
452 seeds will probably not allow this species to adapt to future global changes. Alternatively,  
453 conserving genetic diversity in a botanical garden may be a good option to test whether and  
454 if so, leave time to plants to adapt to rising temperatures and rainfall modifications.  
455 Nevertheless, this approach has potential drawbacks like artificial selection and habitat  
456 conversion if *D. montanum* adapts to *ex-situ* environment, which may differ from their initial  
457 natural environment (Ren et al. 2014). Moreover, if, growing individuals from the all 9  
458 localities studied in an appropriate botanical garden could be a way to set-up *in-situ*  
459 conservation, preliminary experiments have showed that *cultivating D. montanum* under  
460 experimental conditions in a greenhouse is very difficult because of its environmental  
461 requirements (Aymerich, pers. comm.). This confirms that if any, botanical garden would  
462 have to be set up at a relatively high elevation (*i.e.* > 1500 m), where environmental  
463 conditions are similar to the ecological optimum of the species.

464 We can identify three main methods of *in-situ* conservation that could be envisaged  
465 for *D. montanum* (see Godefroid et al. 2011; Ren et al. 2014; Mashinski & Albrecht 2017):  
466 reinforcement, translocation and managed relocation (or assisted migration). The first one is  
467 reinforcement, which consists in adding *ex-situ* grown individuals in their natural population  
468 of origin to increase the total number of individuals, increase the spatial occupancy of the  
469 species and thereby reduce extinction risk. On the one hand, the increase in population size  
470 provided by reinforcement could contribute to counteract the effect of genetic drift. On the  
471 other hand, it would have a limited impact to impede inbreeding as all the individuals would

472 originate from the same genetic pool. The second method consists in translocating  
473 individuals (seeds, seedlings or adult plants) from a population to another one with the same  
474 ecogeography, to increase genetic diversity (the so-called “genetic rescue”) and thus  
475 increase the likelihood of population persistence in a changing climate (Mashinski and  
476 Albrecht 2017). Our results show that *D. montanum* populations harbor substantial levels of  
477 pairwise genetic differentiation which suggest that they have exchanged few or no genetic  
478 migrants for many generations and have possibly evolved distinct adaptative differences. As  
479 a consequence, gene pool mixing may not be appropriate, since the risk of outbreeding  
480 depression could be non-negligible between individuals from the different part of the  
481 geographic distribution of *D. montanum*. It could be thus careful to first experiment *ex-situ*  
482 crossings to check if hybrids are viable, and do not suffer from outbreeding depression.  
483 However, the genetic benefits of mixing source populations during genetic rescue have been  
484 shown to generally outweigh the risks of outbreeding depression and loss of local adaptation  
485 (see Whiteley et al. 2015; Frankham 2015; Ralls et al. 2018, see also Liddell 2021). For  
486 example, translocations with mixed source populations of *Arnica montana* showed that  
487 genetic variation remained similar or increased across successive environments and some  
488 authors documented a 10-fold increase in population size following gene flow between wild  
489 Trinidadian guppy populations (Albrecht and Edwards 2020; Fitzpatrick et al. 2020).

490 Finally, the third method consists in introducing a new population in a suitable new  
491 ecosystem, where *D. montanum* has not been observed yet. This method is called managed  
492 relocation or assisted migration (Mashinski and Albrecht 2017). However, it may represent a  
493 risk of modifying the ecosystem, by creating competition for space and pollinators with  
494 other plants naturally present, or by introducing new pathogens. Thus, these three methods  
495 of reinforcement, translocation, and managed relocation can present risks of outbreeding

496 depression and ecosystem destabilization, and their benefits may not outweigh those risks.  
497 Moreover, since the main threat for *D. montanum* is climate change, on a longer-scale, all  
498 those efforts could be unsuccessful. Keeping individuals in a botanical garden seems to be  
499 the least harmful and risky method for natural populations today and it could be a good start  
500 for crossing experiments between populations.

501 For the very peculiar situation of 2-Nohèdes's locality, which seems to be the  
502 population the most at risk of extinction at the moment, there is still the question of the lack  
503 of flowering. To test whether this problem may be associated with the absence of a specific  
504 environmental stimulus, we may propose to either i) experimentally modify  
505 temperature/water supply, *in situ*, ii) translocate some individuals to localities where *D.*  
506 *montanum* seem healthy (e.g. Cadí range) and see if flowering can be restored and/or iii)  
507 experimentally modify temperature/water supply in the lab to better understand the  
508 conditions required for flowering and figure out the limiting factor in the wild. Alternatively,  
509 it may be due to the fact that that this locality is formed by immature individuals and that  
510 the local population itself may be recovering from an important mortality event. At the  
511 moment, we have no further arguments to support this scenario.

512

### 513 **Conclusion**

514 Overall, our results confirm that the remaining populations of *D. montanum* show evidence  
515 of decreased genetic diversity and evidence of inbreeding at a genomic scale. The degree of  
516 genetic structure observable is consistent with a set of strongly isolated populations no  
517 longer able to maintain gene flow between their sky islands. In this context, *in-situ*  
518 conservation methods are likely to have an effect on the status of the species.  
519 Reinforcement would help counteracting decrease in local population sizes, and

520 translocation would help increasing genetic diversity, buffering inbreeding depression and  
521 perhaps, bring the variation required for *D. montanum* to adapt. This being said, *ex-situ*  
522 crossings are first recommended to verify the absence of outbreeding depression as local  
523 genetic pools were found to differ substantially. As our results support that environmental  
524 change may represent the main risk of extinction for *D. montanum* all these measures may  
525 be however considered as of limited interest on the long term, if the ecological niche of the  
526 species disappears.

527

## 528 **Acknowledgements**

529 This study was funded by the interreg-POCTEFA program (FLORALAB Project EFA294/19) and  
530 is set within the framework of the “Laboratoires d’Excellences (LABEX)” TULIP (ANR-10-LBX-  
531 41) as well as within the framework “École Universitaire de Recherche (EUR)” TULIP-GS  
532 (ANR-18-EURE-0019). We thank Xavier Oliver Martínez-Fornés, Sandra Mendez, Kimberley  
533 Goudéranche, Lucie Schaad, Irene Abad, Queralt Tor and all other contributors from the  
534 FLORALAB network for the help provided in the field. We also thank Olivier François, Lindsey  
535 Clark, Patrick Meirmans and Neander Marcel Heming for technical advice and insightful  
536 discussions.

537

## 538 **Authors’ Contributions and Conflict of Interest**

539 PS, VH, JAMB analysed the data and wrote the manuscript. PAB, JP, AVB, MM, CC, JML and  
540 JAMB contributed to fieldwork. MM, CC and VH coordinated the FLORALAB network and/or  
541 project aspects related to this work and JAMB contributed to the conception of the study. All  
542 authors have read and approved the manuscript. The authors declare no conflict of interest.

543

## 544 **Data Accessibility Statement**

545 Sequencing data have been submitted to the European Nucleotide Archive (ENA;  
546 <https://www.ebi.ac.uk/ena/>) under Study with accession n°PRJEB46773 and samples  
547 accession n°ERS7180281 (SAMEA9457265) and n°ERS7643565 (SAMEA9965271) to  
548 n°ERS7643669 (SAMEA9965375).

549

## 550 **References**

- 551 Ahmad, M., Leroy, T., Krigas, N., Temsch, E.M., Weiss-Scheeweiss, H., Lexer, C., Sehr, E.M.,  
552 Paun, O. (2021) Spatial and ecological drivers of population structure in *Alkanna*  
553 *tinctoria* (Boraginaceae), a polyploid medicinal herb. *Frontiers in Plant Science*,  
554 12:706574.
- 555 Aiello-Lammens, M.E., Boria, R.A., Radosavljevic, A., Vilela, B., Anderson, R.P. (2015) spThin:  
556 an R package for spatial thinning of species occurrence records for use in ecological  
557 niche models. *Ecography*, 38, 541-545.
- 558 Albrecht, M.A., Edwards, C.E. (2020) Genetic monitoring to assess the success of restoring  
559 rare plant populations with mixed gene pools. *Molecular Ecology*, 29, 4037-4039.
- 560 Aymerich, P. (2003) Effects of wild ungulates predation in the conservation of rare plants:  
561 two study cases of the Eastern Pyrenees. *Acta Botanica Barcinonensia*, 49, 147-164.
- 562 Aymerich, P., Martínez-Fornés, X.O., Mendez, S., Mangeot, A., Martin, M., Tenas, B. (2019)  
563 Seguiment de l'endemisme dels Pireneus orientals *Delphinium montanum* per la  
564 xarxa transfronterera FloraCat, Actes del XII Colloqui Internacional de Botànica  
565 Pirenaica - Cantàbrica, 147-165.



- 566 Bagley, J.C., Heming, N.M., Gutiérrez, E.E., Devisetty, U.K., Mock, K.E., Eckert, A.J., Strauss,  
567 S.H. (2020) Genotyping-by-sequencing and ecological niche modeling illuminate  
568 phylogeography, admixture, and Pleistocene range dynamics in quaking aspen  
569 (*Populus tremuloides*). *Ecology and Evolution*, 10, 4609-4629.
- 570 Baird, N.A., Etter, P.D., Atwood, T.S., Currey, M.C., Shiver, A.L., Lewis, Z.A., Selker, E.U.,  
571 Cresko, W.A., Johnson, E.A. (2008) Rapid SNP discovery and genetic mapping using  
572 sequenced RAD markers. *PloS ONE*, 3: e3376.
- 573 Bergl, R.A., Bradley, B.J., Nsubuga, A., Vigilant, L. (2008) Effects of habitat fragmentation,  
574 population size and demographic history on genetic diversity: The Cross River Gorilla  
575 in a comparative context. *American Journal of Primatology*, 70, 848-859.
- 576 Blischak, P.D., Kubatko, L.S., Wolfe, A.D. (2016) Accounting for genotype uncertainty in the  
577 estimation of allele frequencies in autopolyploids. *Molecular Ecology Resources*. 16,  
578 742-754.
- 579 Blischak, P.D., Kubatko, L.S., Wolfe, A.D. (2018) SNP genotyping and parameter estimation in  
580 polyploids using low-coverage sequencing data. *Bioinformatics*, 34, 407-415.
- 581 Bobrowski, M., Weidinger, J., Schickhoff, U. (2021) Is new always better? Frontiers in global  
582 climate datasets for modelling treeline species in the Himalayas. *Atmosphere* 12: 543.
- 583 Brandrud, M.K., Paun, O., Lorenzo, M.T., Nordal, I., Brysting, A.K. (2017) RADseq provides  
584 evidence for parallel ecotypic divergence in the autotetraploid *Cochlearia officinalis*  
585 in Northern Norway. *Scientific Reports*, 7: 5573.
- 586 Brandrud, M.K., Paun, O., Lorenz, R., Baar, J., Hedrén, M. (2019) Restriction-site associated  
587 DNA sequencing of *Nigritella* and *Gymnadenia* (Orchidaceae). *Molecular*  
588 *Phylogenetics and Evolution*, 136, 21-28.

- 589 Brandrud, M.K., Baar, J., Lorenzo, M.T., Athanasiadis, A., Bateman, R.M., Chase, M.W.,  
590 Hedrén, M., Paun, O. (2020). Phylogenomic relationships of diploids and the origins of  
591 allotetraploids in *Dactylorhiza* (Orchidaceae). *Systematic Biology*, 69, 91-109.
- 592 Calevo, J., Gargiulo, R., Bersweden, L., Viruel, J., González-Montelongo, C., Rebbas, K.,  
593 Boutafia L, Fay, M.F. (2021) Molecular evidence of species- and subspecies-level  
594 distinctions in the rare *Orchis patens* s.l. and implications for conservation. *Biodiversity  
595 and Conservation*, 30, 1293-1314.
- 596 Catchen, J., Amores, A., Hohenlohe, P., Cresko, W., Postlethwait, J. (2011) Stacks: building  
597 and genotyping loci de novo from short-read sequences. *G3 – Genes, Genomes,  
598 Genetics*, 1, 171-182.
- 599 Catchen, J., Hohenlohe, P.A., Bassham, S., Amores, A., Cresko, W.A. (2013) Stacks: an analysis  
600 tool set for population genomics. *Molecular Ecology*, 22, 3124-3140.
- 601 Clark, L.V., Lipka, A.E., Sacks, E.J. (2019) polyRAD: Genotype calling with uncertainty from  
602 sequencing data in polyploids and diploids. *G3 – Genes, Genomes, Genetics*, 9, 663-  
603 673.
- 604 Clevenger, J., Chavarro, C., Pearl, S.A., Ozias-Akins, P., Jackson, S.A. (2015) Single Nucleotide  
605 Polymorphism identification in polyploids: a review, example, and recommendations.  
606 *Molecular Plant*, 8, 831-846.
- 607 De Gabriel Hernando, M., Fernández-Gil, J., Roa, I., Juan, J., Ortega, F., De la Calzada, F.,  
608 Revilla, E. (2021) Warming threatens habitat suitability and breeding occupancy of  
609 rear-edge bird specialists. *Ecography*, 44, 1191-1204.
- 610 Dixo, M., Metzger, J.P., Morgante, J.S., Zamudio, K.R. (2009) Habitat fragmentation reduces  
611 genetic diversity and connectivity among toad populations in the Brazilian Atlantic  
612 Coastal Forest. *Biological Conservation*, 142, 1560-1569.

- 613 Dufresne, F., Stift, M., Vergilino, R., Mable, B.K. (2014) Recent progress and challenges in  
614 population genetics of polyploid organisms: an overview of current state-of-the-art  
615 molecular and statistical tools. *Molecular Ecology*, 23, 40-69.
- 616 Fick, S.E., Hijmans, R.J. (2017) New 1 km spatial resolution climate surfaces for global land  
617 areas. *International Journal of Climatology*, 37, 4302-4315.
- 618 Fitzpatrick, S.W., Bradburd, G.S., Kremer, C.T., Salerno, P.E., Angeloni, L.M., Funk, W.C.  
619 (2020) Genomic and fitness consequences of genetic rescue in wild populations. *Current*  
620 *Biology*, 30, 517-522.
- 621 Frankham, R. (2015) Genetic rescue of small inbred populations: meta-analysis reveals large  
622 and consistent benefits of gene flow. *Molecular Ecology*, 24, 2610-2618.
- 623 Frichot, E., Mathieu, F., Trouillon, T., Bouchard, G., François, O. (2014) Fast and efficient  
624 estimation of individual ancestry coefficients. *Genetics* 4, 973-983.
- 625 Frichot, E., François, O. (2015) LEA: An R package for landscape and ecological association  
626 studies. *Methods in Ecology and Evolution*, 6, 925-929.
- 627 Godefroid, S., Piazza, C., Graziano, R., Buord, S., Stevens, A.-D., Agurauja, R., Cowell, C.,  
628 Weekley, C.W., Vogg, G., Iriondo, J.M., Johnson, I., Dixon, B., Gordon, D., Magnanon,  
629 S., Valentin, B., Bjureke, K., Koopman, R., Vicens, M., Venderborght, T. (2011) How  
630 successful are plant species reintroductions? *Biological Conservation*, 144, 672-682.
- 631 Gutiérrez, E.E., Heming, N.M., Penido, G., Dalponte, J.C., Lacerda, A.C.R., Moratelli, R., de  
632 Moura Bubadué, J., da Silva, L.H., Wolf, M.M., Marinho-Filho, J. (2019) Climate  
633 change and its potential impact on the conservation of the Hoary Fox, *Lycalopex*  
634 *vetulus* (Mammalia: Canidae). *Mammalian Biology*, 98, 91-101.
- 635 Ren, H., Jian, S., Liu, H., Zhang, Q., Lu, F. (2014) Advances in the reintroduction of rare and  
636 endangered wild plant species. *Science China Life Sciences*, 57, 603–609.

- 637 Heming, N.M., Dambros, C., Gutiérrez, E. (2018) ENMwizard: advanced techniques for  
638 Ecological Niche Modeling made easy. <https://github.com/HemingNM/ENMwizard>
- 639 Jombart, T. (2008) adegenet: a R package for the multivariate analysis of genetic markers.  
640 *Bioinformatics*, 24, 1403-1405.
- 641 Kamvar, Z.N., Tabima, J.F., Grünwald, N.J. (2014) Poppr: an R package for genetic analysis of  
642 populations with clonal, partially clonal, and/or sexual reproduction. *PeerJ*, 2: e281.
- 643 Karbstein, K., Tomasello, S., Hodač, L., Dunkel, F.G., Daubert, M., Hörandl, E. (2020)  
644 Phylogenomics supported by geometric morphometrics reveals delimitation of  
645 sexual species within the polyploid apomictic *Ranunculus auricomus* complex  
646 (Ranunculaceae). *Taxon*, 69, 1191-1220.
- 647 Karger, D.N., Conrad, O., Böher, J., Kawohl, T., Kreft, H., Soria-Auza, R.W., Zimmermann, N.E.,  
648 Linder, H.P., Kessler, M. (2017). Climatologies at high resolution for the earth's land  
649 surface areas. *Scientific Data*, 4: 170122.
- 650 Kidane, Y.O., Steinbauer, M.J., Beierkuhnlein, C. (2019) Dead end for endemic plant species?  
651 A biodiversity hotspot under pressure. *Global Ecology and Conservation*, 19: e00670.
- 652 Kuhn, M. (2019) caret: classification and regression training. [https://CRAN.R-](https://CRAN.R-project.org/package=caret)  
653 [project.org/package=caret](https://CRAN.R-project.org/package=caret).
- 654 Liddell, E., Sunnucks, P., Cook, C.N. (2021) To mix or not to mix gene pools for threatened  
655 species management? Few studies use genetic data to examine the risks of both  
656 actions, but failing to do so leads disproportionately to recommendations for  
657 separate management. *Biological Conservation*, 256: 109072.
- 658 Lespinas, F., Ludwig, W., Heussner, S. (2014) Hydrological and climatic uncertainties  
659 associated with modeling the impact of climate change on water resources of small  
660 Mediterranean coastal rivers. *Journal of Hydrology*, 511, 403-422.

- 661 López-Pujol, J., Orellana, M. R., Bosch, M., Simon, J., Blanché, C. (2007) Low genetic diversity  
662 and allozymic evidence for autopolyploidy in the tetraploid Pyrenean endemic  
663 larkspur *Delphinium montanum* (Ranunculaceae). *Biological Journal of the Linnean*  
664 *Society*, 155, 211-222.
- 665 Maschinski, J., Albrecth, M.A. (2017) Center for plant conservation's best practice guidelines  
666 for the reintroduction of rare plants. *Plant Diversity*, 39, 390-395.
- 667 McCormack, J.E., Huang, H., Knowles, L.L. (2009) Sky Islands. In: Gillespie, R.G., Clague, D.  
668 (eds) *Encyclopedia of Islands*, University of California Press: Berkeley, CA Pp 839-843.
- 669 Meirmans, P.G., Van Tienderen, P.H. (2013) The effects of inheritance in tetraploids on  
670 genetic diversity and population divergence. *Heredity*, 110, 131-137.
- 671 Meirmans, P.G., Liu, S., van Tienderen, P.H. (2018) The analysis of polyploid genetic data.  
672 *Journal of Heredity*, 109, 283-296.
- 673 Meirmans, P.G. (2020) Genodive version 3.0: Easy-to-use software for the analysis of genetic  
674 data of diploids and polyploids. *Molecular Ecology Resources*, 20, 1126-1131.
- 675 Muscarella, R., Galante, P.J., Soley-Guardia, M., Boria, R.A., Kass, J.M., Uriarte, M., Anderson,  
676 R.P. (2014) ENMeval: an R package for conducting spatially independent evaluations  
677 and estimating optimal model complexity for Maxent ecological niche models.  
678 *Methods in Ecology and Evolution*, 5, 1198-1205.
- 679 Nei, M. (1987) *Molecular Evolutionary Genetics*. Columbia University Press: New York: 1-514.
- 680 Pandit, M.K., Pockock, M.J.O., Kunin, W.E. (2011) Ploidy influences rarity and invasiveness in  
681 plants. *Journal of Ecology*, 99, 1108-1115.
- 682 Paris, J.R., Stevens, J.R., Catchen, J. (2017) Lost in parameter space: a road map for stacks.  
683 *Methods in Ecology and Evolution*, 8, 1360-1373.

- 684 Peery, M.Z., Kirby, R., Reid, B.N., Stoelting, R., Doucet-B  er, E., Robinson, S., V  squez-Carillo,  
685 C., Pauli, J.N., Palsb  ll, P.J. (2012) Reliability of genetic bottleneck tests for detecting  
686 recent population declines. *Molecular Ecology*, 21, 3403-3418.
- 687 Phillips, S.J., Anderson, R.P., Schapire, R.E. (2006) Maximum entropy modelling of species  
688 geographic distributions. *Ecological Modelling*, 190, 231-259.
- 689 Philipps, S.J., Anderson, R.P., Dud  k, M., Shapire, R.E., Blair, M.E. (2017) Opening the black  
690 box: an open-source release of Maxent. *Ecography*, 40, 887-893.
- 691 Ralls, K., Ballou, J.D., Dudash, M.R., Eldridge, M.D.B., Fenster, C.B., Lacy, R.C., Sunnucks, P. &  
692 Frankham, R. (2018) Call for a paradigm shift in the genetic management of  
693 fragmented populations. *Conservation Letters*, 11: e12412.
- 694 Ren, H., Jian, S.G., Liu, H.W., Zhang, Q.M., Lu, H.F. (2014) Advances in the reintroduction of  
695 rare and endangered wild plant species. *Science China Life Sciences*, 57, 603-609.
- 696 Rochette, N.C., Catchen, J.M. (2017) Deriving genotypes from RAD-seq short read data using  
697 Stacks. *Nature Protocols*, 12, 2640-2659.
- 698 Rousset, F. (1997) Genetic differentiation and estimation of gene flow from *F*-statistics under  
699 Isolation by Distance. *Genetics*, 145, 1219-1228.
- 700 Simon, J., Bosch, M., Molero, J., Blanch  , C. (2001) Conservation biology of the Pyrenean  
701 larkspur (*Delphinium montanum*): a case of conflict of plant versus animal  
702 conservation? *Biological Conservation*, 98, 305-314.
- 703 UICN France, FCBN, AFB, MNHN (2018) La liste rouge des esp  ces menac  es en France –  
704 Chapitre Flore vasculaire de France m  tropolitaine. Paris, France.
- 705 Urban, M.C. (2015) Accelerating extinction risk from climate change. *Science*, 348, 571-573.
- 706 Van de Peer, Y., Mizrachi, E., Marchal, K. (2017) The evolutionary significance of polyploidy.  
707 *Nature Review Genetics*, 18, 411-424.

- 708 Van de Peer, Y., Ahsman, T.-L., Soltis, P.S., Soltis, D.E. (2021) Polyploidy: an evolutionary and  
709 ecological force in stressful times. *Plant Cell*, 33, 11-26.
- 710 Vinogradov, A.E. (2003) Selfish DNA is maladaptive: evidence from the plant Red List. *Trends*  
711 *in Genetics*, 19, 609-614.
- 712 Wagner, N.D., He, L., Hörandl, E. (2021) Phylogenomic relationships and evolution of  
713 polyploid *Salix* species revealed by RAD sequencing data. *Frontiers Plant Sciences*, 11,  
714 1077.
- 715 Whiteley, A.R., Fitzpatrick, S.W., Funk, W.C., Tallmon, D.A. (2015) Genetic rescue to the  
716 rescue. *Trends in Ecology and Evolution*, 30, 42-49.
- 717 Závěská, E., Maylandt, C., Paun, O., Bertel, C., Božo, F., The STEPPE Consortium,  
718 Schönschwetter, P. (2019) Multiple auto- and allopolyploidisations marked the Pleistocene  
719 history of the widespread Eurasian steppe plant *Astragalus onobrychis* (Fabaceae).  
720 *Molecular Phylogenetics and Evolution*, 139, 106572.

721

## 722 **Tables**

723

724 **Table 1** Geographic coordinates (in °) and elevation (in m above sea level) of the sampling  
725 localities, sample size ( $N$ ), observed ( $H_O$ ) and expected ( $H_E$ ) levels of heterozygosity,  
726 deviation from panmixia ( $G_S$ ), total number of alleles ( $A$ ) and number of private alleles ( $A_p$ )  
727 per locality.

| Locality       | Latitude | Longitude | Elevation | $N$ | $H_O$ | $H_E^*$ | $G_S$        | $A$    | $A_p$ |
|----------------|----------|-----------|-----------|-----|-------|---------|--------------|--------|-------|
| 1 Orri de Baix | 42.444   | 2.119     | 2115      | 12  | 0.117 | 0.171   | <b>0.343</b> | 17 549 | 275   |
| 2 Nohèdes      | 42.615   | 2.263     | 1758      | 12  | 0.101 | 0.146   | <b>0.336</b> | 19 570 | 3,704 |
| 3 Vallter      | 42.426   | 2.264     | 2141      | 12  | 0.095 | 0.147   | <b>0.378</b> | 16 862 | 3,483 |

|   |              |        |       |      |     |              |              |              |        |       |
|---|--------------|--------|-------|------|-----|--------------|--------------|--------------|--------|-------|
| 4 | Pedraforca   | 42.237 | 1.704 | 2366 | 10  | 0.144        | 0.244        | <b>0.426</b> | 22 090 | 1,069 |
| 5 | Serra        | 42.277 | 1.688 | 2586 | 12  | 0.159        | 0.237        | <b>0.346</b> | 22 456 | 524   |
|   | Pedregosa    |        |       |      |     |              |              |              |        |       |
| 6 | Cambre d'Aze | 42.451 | 2.129 | 2637 | 12  | 0.134        | 0.209        | <b>0.380</b> | 27 075 | 668   |
| 7 | Tosa         | 42.315 | 1.886 | 2153 | 12  | 0.125        | 0.177        | <b>0.315</b> | 21 782 | 3,857 |
| 8 | Bastanist    | 42.289 | 1.688 | 1979 | 12  | 0.165        | 0.242        | <b>0.332</b> | 26 822 | 310   |
| 9 | Torreta de   | 42.283 | 1,574 | 2358 | 12  | 0.122        | 0.191        | <b>0.376</b> | 17 876 | 4,537 |
|   | Cadí         |        |       |      |     |              |              |              |        |       |
|   |              |        |       |      | 106 | <b>0.129</b> | <b>0.196</b> | <b>0.361</b> |        |       |

728 Geographic coordinates are in WGS84.

729 Population genetic statistics were computed based on 5 095 SNPs. Statistically significant values are indicated

730 in bold ( $p < 0.05$ ).

731 \* $H_E$ : unbiased expected heterozygosity measured following Nei (1987) in Genodive.

732

733 **Table 2** Current and future *Delphinium montanum* suitable area (in km<sup>2</sup>) as modelled and

734 predicted from Ecological Niche Modelling under different model selection criteria (LowAIC

735 and AUC) and thresholding methods (10<sup>th</sup> percentile of training presence, x10ptp and

736 Maximum training sensitivity plus specificity, mtss. Future predictions are reported for

737 several time periods (2011-2040, 2041-2070 and 2071-2100) and various Representative

738 Concentration Pathways (RCP 2.6, 7.0 and 8.5).

| Model selection criterion | Thresholds methods | Current | 2011-2040 |         |         | 2041-2070 |         |         | 2071-2100 |         |         |
|---------------------------|--------------------|---------|-----------|---------|---------|-----------|---------|---------|-----------|---------|---------|
|                           |                    |         | RCP 2.6   | RCP 7.0 | RCP 8.5 | RCP 2.6   | RCP 7.0 | RCP 8.5 | RCP 2.6   | RCP 7.0 | RCP 8.5 |
|                           |                    |         | LowAIC    | x10ptp  | 2670    | 523       | 492     | 526     | 137       | 17      | 24      |
| AUC                       | x10ptp             | 2365    | 459       | 455     | 446     | 161       | 25      | 43      | 287       | 0       | 0       |
|                           | mtss               |         |           |         |         |           |         |         |           |         |         |

739

740 **Figures**



741

742 **Figure 1** Map representing the sampling localities (pink dots) within the extant geographic  
743 distribution of *Delphinium montanum*.

744

745 **Figure 2 A)** Principal Component Analysis (PCA) displaying the two first axes (PC1 and PC2)  
746 representing 14.85% and 9.21% of the total genetic variance. PCA was computed based on  
747 the 106 individuals of *D. montanum* genotyped at 5 095 SNPs whose colours represent  
748 sampling localities. **B)** Values of the cross-entropy criterion for a number of clusters ranging  
749 from  $K = 1$  to 10 (10 sNMF runs each). The optimal number of  $K$  was found to be 6. **C)** Barplot  
750 of ancestry coefficients obtained from sNMF for 106 individuals for  $K = 2$  and  $K = 6$ , based on  
751 5 095 SNPs.

752

753 **Figure 3** Pattern of Isolation By Distance (IBD) across the data set. Linearized  $G_{ST}$ s values (*i.e.*  
754  $\ln(G_{ST}/(1 - G_{ST}))$ ) are plotted against  $\ln$ -geographical distances.

755 **Figure 4** Geographic areas holding suitable climatic conditions for *Delphinium montanum*  
756 with projection under present climatic conditions (average for 1981-2010) and consensus  
757 projection (from 5 Global Climate Models (CGMs): GFDL-ESM4, UKESM1-0-LL, MPI-ESM1-2-  
758 HR, IPSL-CM6A-LR and MRI-ESM2-0), for various plausible climatic scenarios for years 2035  
759 (average for 2011-2040), 2055 (average for 2041-2070) and three Representative  
760 Concentration Pathways (RCPs): RCP 26, RCP 70 and RCP 8.5. The time period 2071-2100 is  
761 not represented since the suitable area would have completely disappeared for RCPs 7.0 and  
762 8.5. The Barplot displays current and future area values under various plausible climatic  
763 scenarios. These values correspond to “LowAIC” model (“AUC” model being very similar).

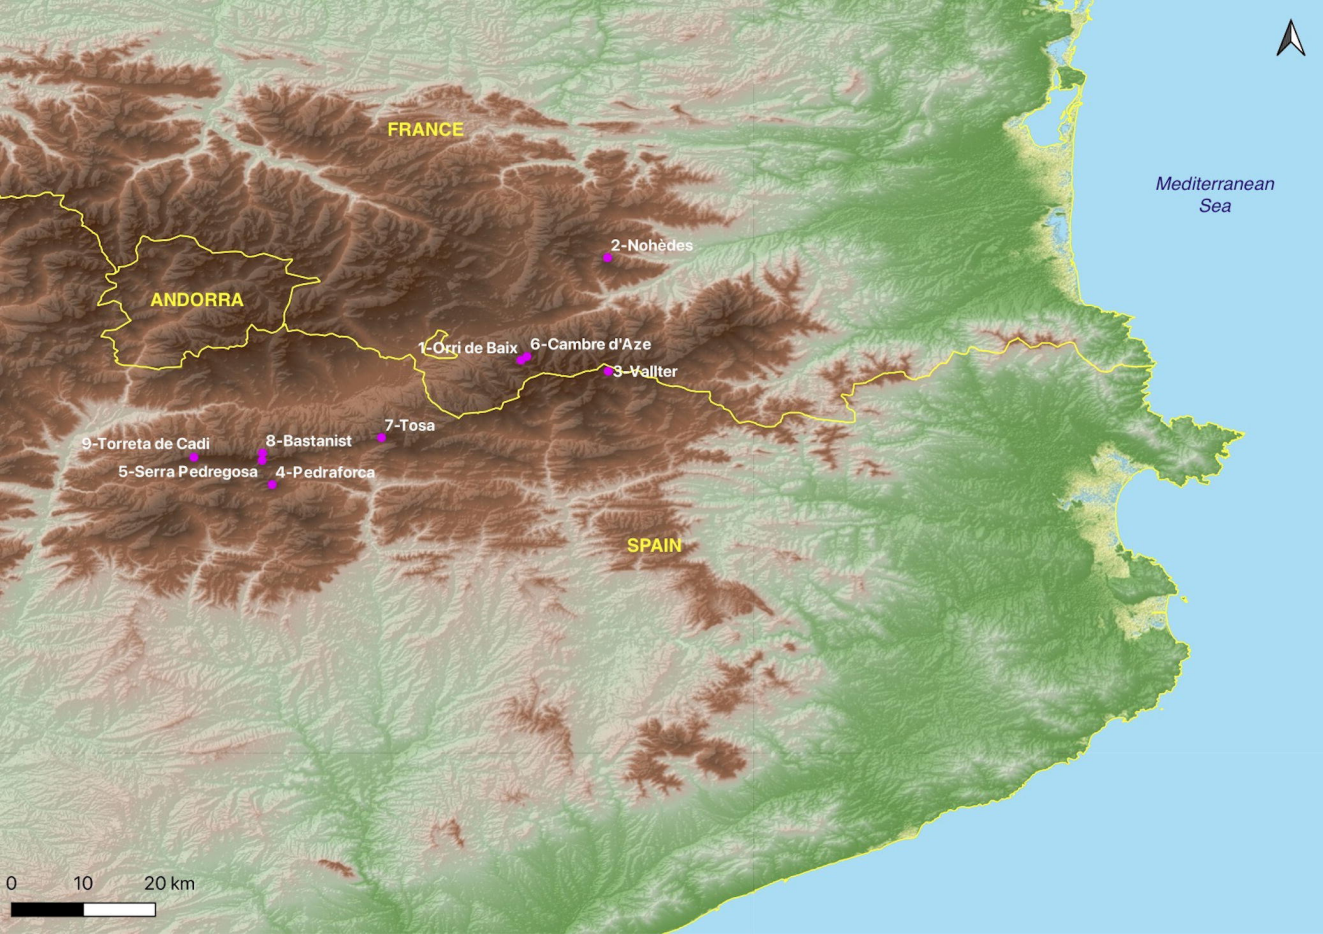

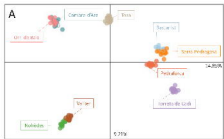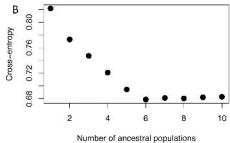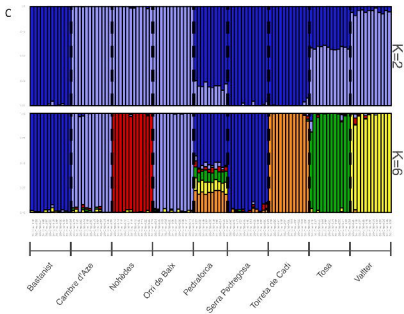

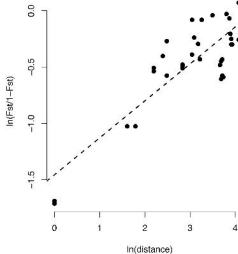

### Current

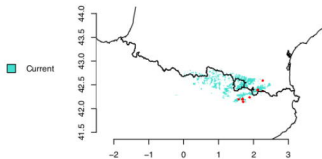

### Species total suitable area

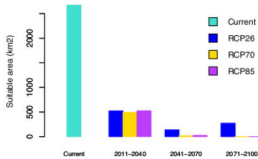

### 2011-2040

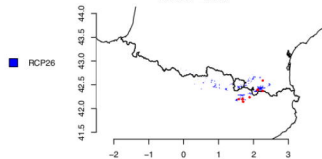

### 2041-2070

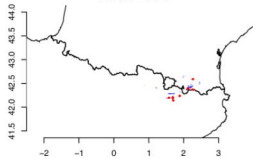

RCP70

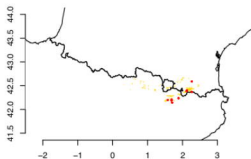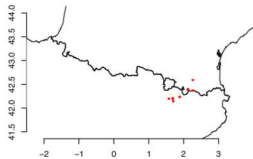

RCP85

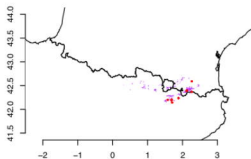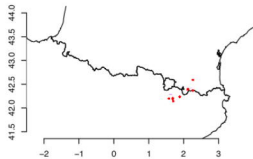

Source: https://www.biorxiv.org/content/10.1101/2021.09.15.460086v2.full.pdf
